# Supplementary material
Source: publisher site journal article supplement (https://www.dovepress.com/article/261960)
Supplement: Supplementary file 1 [file get_supplementary_file.php]

# SUPPLEMENT

## Table S1: Baseline Characteristics of DP+ and DP− Patients

| **Characteristica** | **DP+**  **N=86** | **DP−**  **N=148** | ***P* Value** |
| --- | --- | --- | --- |
| Male, n (%)b | 50 (58.0) | 67 (45.0) | 0.058 |
| Age, years, mean (SD)c | 12.3 (4.0) | 12.9 (3.8) | 0.28 |
| Age category, n (%) |  |  | 0.43 |
| 4 - 7 | 14 (16.0) | 22 (15.0) |  |
| 8 - 11 | 19 (22.0) | 21 (14.0) |  |
| 12 - 14 | 19 (22.0) | 39 (26.0) |  |
| 15 - 17 | 34 (40.0) | 66 (45.0) |  |
| Adjunctive index AED therapy, n (%)d | 57 (66.0) | 73 (49.0) | 0.012 |
| Prior AED claims, mean (SD) | 2.0 (1.4) | 1.6 (1.5) | 0.027 |
| Claims for branded AEDs | 0.7 (0.9) | 0.5 (0.9) | 0.19 |
| Claims for generic AEDs (SD) | 1.3 (1.1) | 1.1 (1.1) | 0.052 |
| Payer type, n (%) |  |  | 0.42 |
| Commercial | 40 (47.0) | 80 (54.0) |  |
| Medicaid | 43 (50.0) | 61 (41.0) |  |
| Other | 3 (3.5) | 7 (4.7) |  |
| **Comorbidities** |  |  |  |
| Developmental and/or psychiatric disorders, n (%) | 86 (100.0) | 0 (0.0) | <0.001 |
| Disorders of psychological development (including autism) | 26 (30.0) | 0 (0.0) | <0.001 |
| ADHD | 24 (28.0) | 0 (0.0) | <0.001 |
| Autism | 23 (27.0) | 0 (0.0) | <0.001 |
| Unspecified developmental delay | 18 (21.0) | 0 (0.0) | <0.001 |
| Anxiety | 13 (15.0) | 0 (0.0) | <0.001 |
| Intellectual disability | 12 (14.0) | 0 (0.0) | <0.001 |
| Depression | 9 (10.0) | 0 (0.0) | <0.001 |
| Behavioral/emotional disorders (except ADHD) | 8 (9.3) | 0 (0.0) | <0.001 |
| Cognitive impairment | 3 (3.5) | 0 (0.0) | 0.022 |
| Schizophrenia | 1 (1.2) | 0 (0.0) | 0.19 |
| Medical disorders, n (%) | 47 (55.0) | 53 (36.0) | 0.005 |
| Gastrointestinal disorders | 14 (16.0) | 9 (6.1) | 0.012 |
| Sleep disorders | 13 (15.0) | 8 (5.4) | 0.012 |
| Endocrine disorders | 8 (9.3) | 5 (3.4) | 0.056 |
| Malnutrition/eating difficulties | 8 (9.3) | 2 (1.4) | 0.004 |
| Musculoskeletal disorders | 8 (9.3) | 18 (12.0) | 0.50 |
| Chronic lower respiratory disorders (including asthma) | 7 (8.1) | 7 (4.7) | 0.29 |
| Congenital non-neurologic malformations | 6 (7.0) | 7 (4.7) | 0.47 |
| Genital disorders | 6 (7.0) | 7 (4.7) | 0.47 |
| Skin disorders | 6 (7.0) | 4 (2.7) | 0.12 |
| Chromosomal abnormalities | 5 (5.8) | 0 (0.0) | 0.003 |
| Urinary tract disorders | 5 (5.8) | 3 (2.0) | 0.12 |
| Hematologic conditions | 3 (3.5) | 1 (0.7) | 0.11 |
| Obesity | 3 (3.5) | 3 (2.0) | 0.50 |
| Cardiovascular disorders | 2 (2.3) | 5 (3.4) | 0.65 |
| Immune disorders | 2 (2.3) | 1 (0.7) | 0.28 |
| Nutritional deficiencies | 2 (2.3) | 2 (1.4) | 0.58 |
| Benign neoplasms | 1 (1.2) | 3 (2.0) | 0.62 |
| Metabolic disorders | 1 (1.2) | 0 (0.0) | 0.19 |
| Hyponatremia | 1 (1.2) | 0 (0.0) | 0.19 |
| Hearing impairment/deafness | 0 (0.0) | 2 (1.4) | 0.28 |
| Neurological disorders, n (%) | 41 (48.0) | 47 (32.0) | 0.015 |
| Other neurologic disorders | 17 (20.0) | 8 (5.4) | <0.001 |
| Headache conditions | 16 (19.0) | 18 (12.0) | 0.18 |
| CNS infections | 12 (14.0) | 7 (4.7) | 0.013 |
| Cerebral palsy | 7 (8.1) | 11 (7.4) | 0.84 |
| Neurologic congenital malformations | 6 (7.0) | 3 (2.0) | 0.058 |
| Cerebrovascular disease | 4 (4.7) | 3 (2.0) | 0.26 |
| Brain tumor | 3 (3.5) | 3 (2.0) | 0.50 |
| CNS neoplasms | 3 (3.5) | 3 (2.0) | 0.50 |
| Visual impairment/blindness | 2 (2.3) | 1 (0.7) | 0.28 |
| Hydrocephalus | 2 (2.3) | 1 (0.7) | 0.28 |
| Traumatic brain injury | 2 (2.3) | 1 (0.7) | 0.28 |

ADHD, attention deficit hyperactivity disorder; AED, antiepileptic drug; CNS, central nervous system; DP, developmental and/or psychiatric disorder; SD, standard deviation

a Remaining patients were female.

b Patient demographics were assessed as of the index date; comorbidities were assessed in the 90 days prior to the index date.

c Only the patient birth year was available, so all patients were assigned a birthdate of July 1 for the purpose of calculating age.

d Remaining patients received monotherapy.
